# Supplementary material for: Towards understanding transfluthrin efficacy in a pyrethroid-resistant strain of the malaria vector Anopheles funestus with special reference to cytochrome P450-mediated detoxification
Source: PubMed Central journal article supplement — Curr Res Parasitol Vector Borne Dis. 2021 Jul 19;1:100041. doi: 10.1016/j.crpvbd.2021.100041 (PMC8906121; doi:10.1016/j.crpvbd.2021.100041), 2021-07-19
Supplement: mmc1.pdf [file mmc1.pdf]

# Supplementary Information

## **Towards understanding transfluthrin efficacy in a pyrethroid-resistant strain of the malaria vector *Anopheles funestus* with special reference to cytochrome P450-mediated detoxification**

Melanie Nolden<sup>a,b</sup>, Andreas Brockmann<sup>a,c</sup>, Ulrich Ebbinghaus-Kintscher<sup>a</sup>, Kai-Uwe Brueggen<sup>a</sup>, Sebastian Horstmann<sup>a</sup>, Mark J.I. Paine<sup>b</sup>, Ralf Nauen<sup>a,\*</sup>

<sup>a</sup> *Bayer AG, Crop Science Division, Alfred Nobel Str. 50, D-40789 Monheim am Rhein, Germany*

<sup>b</sup> *Department of Vector Biology, Liverpool School of Tropical Medicine, Pembroke Place, Liverpool L3 5QA, United Kingdom*

<sup>c</sup> *Rheinische Friedrich-Wilhelms-Universität Bonn, D-53113 Bonn, Germany*

\* Corresponding author: [ralf.nauen@bayer.com](mailto:ralf.nauen@bayer.com)

**Supplementary Figure S1.** Steady-state kinetics of BOMFC O-debenzylation leading to 7-hydroxy-4-(trifluoromethyl)coumarin (HC) by cytochrome P450s of microsomal preparations of *Anopheles funestus* strain FANG und FUMOZ-R. Data points are mean values  $\pm$  standard deviation (SD) ( $n = 3$ ). The calculated  $K_m$ - and  $V_{max}$ -values for BOMFC are apparent values based on general microsomal monooxygenase activity.

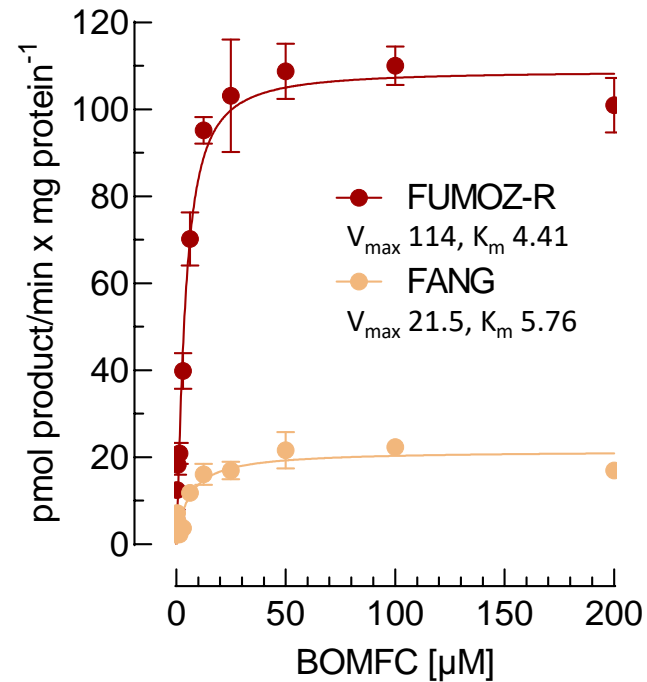

**Supplementary Table S1.** Primer sequences and GenBank numbers for target and reference genes used in qPCR.

| <b>Gene name</b>            | <b>Forward 5' to 3'</b> | <b>Reverse 5' to 3'</b> | <b>Amplicon (bp)</b> |
|-----------------------------|-------------------------|-------------------------|----------------------|
| <i>Ribosomal Protein S7</i> | GTGTTTCGGTCCAAGGTGAT    | TCCGAGTTCATTTCCAGCTC    | 111                  |
| <i>Actin 5c</i>             | TAAACCCAAAAGCCAATCG     | ACCGGATGCATACAGTGACA    | 98                   |
| <i>CYP6P9A</i>              | AACTTGCGGCACAGGCATTC    | TCTCCTCGATTGCTTGGTTG    | 144                  |
| <i>CYP6P9B</i>              | CGATCCACTATCAGGACATC    | AAGTGCCACATCCCATAGTG    | 130                  |

| <b>Gene name</b>            | <b>Vector Base code</b> | <b>GenBank Acc.</b> | <b>UniProt</b> |
|-----------------------------|-------------------------|---------------------|----------------|
| <i>Ribosomal Protein S7</i> | AFUN007153              | EF450776.1          | A0A182RLN5     |
| <i>Actin 5c</i>             | AFUN006819-RA           | not available       | A0A182RKQ1     |
| <i>CYP6P9A</i>              | AFUN015792              | KR866022.1          | A0A0S1S5U9     |
| <i>CYP6P9B</i>              | AFUN015889              | KR866046.1          | A0A096XPX9     |

**Supplementary Table S2.** EC<sub>50</sub>-values (μM) of common pyrethroids and transfluthrin derivatives measured on functionally expressed house fly voltage-gated sodium channels (VGSC) using a cell-based membrane potential cation influx assay. Data were taken from Figs. 2A and 2B.

|                      | EC <sub>50</sub> (μM) | 95% CI         | -LogEC <sub>50</sub> (M) | 95% CI    |
|----------------------|-----------------------|----------------|--------------------------|-----------|
| <b>Deltamethrin</b>  | 0.00529               | 0.00443–0.0063 | 8.28                     | 8.20–8.35 |
| <b>Cypermethrin</b>  | 0.0389                | 0.0342–0.0443  | 7.41                     | 7.35–7.47 |
| <b>Permethrin</b>    | 0.721                 | 0.591–0.882    | 6.14                     | 6.05–6.27 |
| <b>Transfluthrin</b> | 1.77                  | 1.62–1.94      | 5.75                     | 5.71–5.79 |
| <b>TF-0</b>          | 1920*                 | 1109–3748      | 2.72                     | 2.43–2.95 |
| <b>TF-1</b>          | 315*                  | 207–525        | 3.50                     | 3.28–3.68 |
| <b>TF-3</b>          | 4.89                  | 4.23–5.66      | 5.31                     | 5.25–5.37 |
| <b>TF-5</b>          | 0.736                 | 0.65–0.834     | 6.13                     | 6.08–6.19 |

\* Extrapolated value

**Supplementary Table S3.** LC<sub>50</sub>-values (mg/m<sup>2</sup>) of different pyrethroids against *Anopheles funestus* strains FANG and FUM0Z-R in glazed tile contact bioassays. Synergists were applied prior to insecticide exposure.

|                | <i>A. funestus</i> FANG |                          |                 |             |     | <i>A. funestus</i> FUM0Z-R |                  |            |     |                  | Synergistic Ratio (FUM0Z-R) |  |
|----------------|-------------------------|--------------------------|-----------------|-------------|-----|----------------------------|------------------|------------|-----|------------------|-----------------------------|--|
|                | LC <sub>50</sub>        | Synergistic Ratio (FANG) | 95 % CI         | Slope ± SE  | n   | LC <sub>50</sub>           | 95 % CI          | Slope ± SE | n   | Resistance Ratio | Synergistic Ratio (FUM0Z-R) |  |
| TF             | 0.023                   |                          | 0.0155-0.0324   | 1.47 0.168  | 420 | 0.0576                     | 0.0191-0.112     | 1.6 0.218  | 360 | 2.51             | -                           |  |
| + PBO          | 0.0389                  | 0.591                    | 0.0201-0.0699   | 4.10 1.48   | 140 | 0.00733                    | 0.00389-0.0148   | 4.07 1.51  | 120 | 0.319            | 7.86                        |  |
| + 1-ABT        | 0.0184                  | 1.25                     | 0.00502-0.0337  | 2.38 0.676  | 140 | 0.0057                     | 0.000468-0.00867 | 3.51 1.62  | 120 | 0.248            | 10.1                        |  |
| + Triflumizole | 0.0187                  | 1.23                     | 0.00999-0.0279  | 2.28 0.499  | 280 | 0.00465                    | 0.0000688-0.0167 | 1.55 0.395 | 120 | 0.203            | 12.4                        |  |
| TF-0           | 1.19                    |                          | 0.565-1.79      | 2.90 0.932  | 140 | 4.47                       | 2.89-6.01        | 3.17 0.655 | 360 | 3.77             | -                           |  |
| + PBO          | 0.691                   | 1.72                     | 0.223-1.65      | 1.59 0.304  | 140 | 0.553                      | 0.281-0.805      | 3.52 1.13  | 120 | 0.47             | 8.07                        |  |
| + 1-ABT        | 1.33                    | 0.895                    | 0.849-2.05      | 2.66 0.565  | 140 | 1.21                       | 0.601-3.025      | 3.63 0.917 | 120 | 1.02             | 3.69                        |  |
| + Triflumizole | 1.16                    | 1.026                    | 0.761-1.78      | 3.24 0.823  | 140 | 0.609                      | 0.316-0.944      | 2.79 0.798 | 120 | 0.51             | 7.34                        |  |
| TF-1           | 1.42                    |                          | 1.02-1.85       | 2.97 0.453  | 560 | 1.41                       | 1.15-1.83        | 4.78 0.772 | 350 | 0.99             | -                           |  |
| + PBO          | 1.4                     | 1.01                     | 0.872-2.19      | 3.12 0.813  | 140 | 3.77                       | 2.4-5.93         | 2.60 0.576 | 140 | 2.65             | 0.376                       |  |
| + 1-ABT        | 0.843                   | 1.68                     | 0.434-1.44      | 3.43 1.16   | 140 | 0.34                       | 0.0645-0.579     | 1.72 0.434 | 420 | 0.403            | 4.16                        |  |
| + Triflumizole | 1.62                    | 0.877                    | 1.03-2.54       | 3.04 0.688  | 140 | 2.42                       | 0.537-5.42       | 2.80 0.758 | 140 | 1.70             | 0.584                       |  |
| TF-3           | 0.0494                  |                          | 0.0350-0.0664   | 1.96 0.256  | 420 | 0.285                      | 0.225-0.354      | 3.32 0.495 | 360 | 5.77             | -                           |  |
| + PBO          | 0.0158                  | 3.13                     | 0.00652-0.0314  | 1.41 0.285  | 140 | 0.00759                    | 0.00212-0.0142   | 1.93 0.513 | 120 | 0.154            | 37.6                        |  |
| + 1-ABT        | 0.0183                  | 2.7                      | 0.00795-0.0257  | 4.53 1.43   | 140 | 0.0304                     | 0.0187-0.0483    | 3.70 1.11  | 120 | 0.617            | 9.36                        |  |
| + Triflumizole | 0.0263                  | 1.87                     | 0.0132-0.0419   | 2.52 0.688  | 140 | 0.012                      | 0.00408-0.0214   | 2.94 0.788 | 120 | 0.243            | 23.8                        |  |
| TF-5           | 0.0237                  |                          | 0.0132-0.0394   | 2.03 0.243  | 420 | 0.0446                     | 0.0299-0.0592    | 2.08 0.316 | 560 | 1.88             | -                           |  |
| + PBO          | 0.012                   | 1.98                     | 0.00686-0.0258  | 4.24 1.40   | 140 | 0.018                      | 0.00558-0.0338   | 2.23 0.574 | 140 | 0.758            | 2.48                        |  |
| + 1-ABT        | 0.0224                  | 1.06                     | 0.00174-0.0468  | 2.05 0.695  | 140 | 0.0141                     | 0.00515-0.0241   | 2.36 0.687 | 140 | 0.593            | 3.17                        |  |
| + Triflumizole | 0.0283                  | 0.837                    | 0.0143-0.0481   | 1.91 0.414  | 140 | 0.0203                     | 0.00372-0.0384   | 2.28 0.706 | 140 | 0.856            | 2.20                        |  |
| Permethrin     | 0.543                   |                          | 0.409-0.702     | 2.28 0.294  | 420 | 4.21                       | 2.79-5.88        | 1.99 0.278 | 360 | 7.76             | -                           |  |
| + PBO          | 0.273                   | 1.99                     | 0.197-0.471     | 5.18 1.43   | 140 | 0.327                      | 0.128-0.516      | 4.13 1.2   | 120 | 0.602            | 12.9                        |  |
| + 1-ABT        | 0.0834                  | 6.51                     | 0.0478-0.14     | 1.80 0.331  | 140 | 0.523                      | 0.147-0.935      | 2.48 0.693 | 120 | 0.962            | 8.06                        |  |
| + Triflumizole | 0.329                   | 1.65                     | 0.0884-0.505    | 2.69 1.03   | 140 | 0.22                       | 0.102-0.422      | 2.46 0.496 | 120 | 0.404            | 19.2                        |  |
| Cypermethrin   | 0.0968                  |                          | 0.0686-0.126    | 2.74 0.479  | 420 | 7.54                       | 5.24-10.4        | 1.86 0.204 | 540 | 77.9             | -                           |  |
| + PBO          | 0.00882                 | 11                       | 0.00277-0.0178  | 1.8 0.459   | 140 | 0.0451                     | 0.0140-0.0880    | 1.73 0.4   | 140 | 0.466            | 167                         |  |
| + 1-ABT        | 0.0157                  | 6.17                     | 0.00408-0.0327  | 1.34 0.323  | 140 | 0.0358                     | 0.0057-0.146     | 1.34 0.243 | 140 | 0.37             | 210                         |  |
| + Triflumizole | 0.065                   | 1.49                     | 0.0312-0.121    | 1.95 0.371  | 140 | 0.493                      | 0.168-0.95       | 1.23 0.171 | 400 | 5.1              | 15.3                        |  |
| Deltamethrin   | 0.0206                  |                          | 0.0153-0.0273   | 1.38 0.119  | 560 | 4.61                       | 2.73-7.5         | 1.07 0.102 | 540 | 223              | -                           |  |
| + PBO          | 0.00074                 | 27.8                     | 0.000224-0.0016 | 1.23 0.356  | 280 | 0.0103                     | 0.0037-0.0231    | 1.88 0.341 | 140 | 0.499            | 448                         |  |
| + 1-ABT        | 0.00327                 | 6.29                     | 0.00090-0.0105  | 0.741 0.242 | 140 | 0.0318                     | 0.00515-0.0822   | 1.43 0.337 | 140 | 1.54             | 145                         |  |
| + Triflumizole | 0.00518                 | 3.98                     | 0.00142-0.0126  | 1.40 0.263  | 140 | 0.0364                     | 0.0239-0.053     | 1.34 0.137 | 460 | 1.77             | 127                         |  |
